# Supplementary material for: Efficacy of Various Treatment in Premature Ejaculation: Systematic Review and Network Meta-Analysis
Source: PubMed Central journal article supplement — World J Mens Health. 2023 Aug 9;42(2):338–46. doi: 10.5534/wjmh.230030 (PMC10949017; doi:10.5534/wjmh.230030), 2023-08-09
Supplement: wjmh-42-338-s001.pdf [file wjmh-42-338-s001.pdf]

| Study                                  | Risk of bias domains |    |    |    |    |    |
|----------------------------------------|----------------------|----|----|----|----|----|
|                                        | D1                   | D2 | D3 | D4 | D5 | D6 |
| Waldinger et al (1994) [1]             | +                    | +  | -  | -  | -  | ×  |
| Kara et al (1996) [2]                  | ?                    | ×  | -  | -  | +  | ×  |
| Waldinger et al (1997) [3]             | ?                    | +  | +  | -  | -  | ×  |
| Biri et al (1998) [4]                  | ?                    | +  | +  | -  | +  | -  |
| Kim and Seo (1998) [5]                 | ?                    | -  | +  | -  | +  | ×  |
| Waldinger et al (1998) [6]             | +                    | +  | +  | +  | +  | +  |
| McMahon (1998) [7]                     | ?                    | +  | ×  | +  | -  | ×  |
| Choi et al (1999) [8]                  | +                    | +  | +  | +  | +  | +  |
| Abdel-Hamid et al (2001) [9]           | +                    | -  | +  | +  | -  | ×  |
| Waldinger et al (2001) [10]            | +                    | +  | +  | +  | +  | +  |
| Salonia et al (2002) [11]              | ?                    | +  | +  | +  | +  | -  |
| Novaretti et al (2002) [12]            | ?                    | +  | -  | +  | -  | ×  |
| Atmaca et al (2002) [13]               | ?                    | ×  | +  | +  | +  | ×  |
| Manasia et al (2003) [14]              | ?                    | +  | -  | +  | -  | ×  |
| Busato and Galindo (2004) [15]         | +                    | +  | +  | +  | +  | +  |
| Kilic et al (2005) [16]                | -                    | +  | -  | +  | +  | ×  |
| McMahon et al (2005) [17]              | +                    | ×  | +  | +  | +  | ×  |
| Safarinejad and Hosseini (2006) [18]   | +                    | +  | +  | +  | +  | +  |
| Safarinejad (2006) [19]                | +                    | +  | +  | +  | +  | +  |
| Pryor et al (2006) [20]                | ?                    | +  | +  | +  | +  | -  |
| Arafa and Shamloul (2006) [21]         | +                    | +  | +  | +  | +  | +  |
| Wang et al (2007) [22]                 | ?                    | -  | -  | +  | +  | ×  |
| Hosseini and Yarmohammadi (2007) [23]  | +                    | +  | -  | +  | +  | ×  |
| Dinsmore et al (2007) [24]             | ?                    | +  | +  | +  | +  | -  |
| Athanasios et al (2007) [25]           | ?                    | +  | +  | +  | +  | -  |
| Arafa and Shamloul (2007) [26]         | +                    | +  | +  | +  | +  | +  |
| Salem et al (2008) [27]                | -                    | +  | +  | -  | +  | ×  |
| Safarinejad (2008) [28]                | +                    | +  | +  | +  | +  | +  |
| Mattos et al (2008) [29]               | -                    | +  | +  | +  | +  | -  |
| Mathers et al (2009) [30]              | +                    | ×  | -  | -  | +  | ×  |
| Farnia et al (2009) [31]               | +                    | +  | +  | +  | +  | +  |
| Dinsmore and Wyllie (2009) [32]        | +                    | +  | +  | +  | +  | +  |
| Buvat et al (2009) [33]                | +                    | +  | +  | +  | +  | +  |
| Aversa et al (2009) [34]               | +                    | +  | +  | +  | +  | +  |
| McMahon et al (2010) [35]              | +                    | +  | +  | +  | +  | +  |
| Alghobary et al (2010) [36]            | ?                    | -  | +  | +  | +  | -  |
| Carson and Wyllie (2010) [37]          | +                    | +  | +  | +  | +  | +  |
| Rezakhaniha and Sirosbakht (2010) [38] | ×                    | +  | +  | +  | +  | ×  |
| Zhang et al (2012) [39]                | ?                    | -  | +  | +  | +  | ×  |
| Pastore et al (2012) [40]              | -                    | +  | +  | +  | +  | -  |
| Kaynar et al (2012) [41]               | -                    | +  | +  | +  | +  | -  |
| Bar-Or et al (2012) [42]               | ?                    | +  | +  | +  | +  | -  |

Supplement Fig. 1. Risk-of-bias assessment for individual studies.

|  |                                         | Risk of bias domains |    |    |    |    |    |
|--|-----------------------------------------|----------------------|----|----|----|----|----|
|  |                                         | D1                   | D2 | D3 | D4 | D5 | D6 |
|  | Abdallah et al (2012) [43]              | +                    | +  | +  | +  | +  | +  |
|  | Khan and Rasaily (2013) [44]            | ?                    | +  | +  | +  | +  | -  |
|  | McMahon et al (2013) [45]               | +                    | -  | +  | +  | -  | ×  |
|  | Lee et al (2013) [46]                   | +                    | +  | +  | +  | +  | +  |
|  | Shinghal et al (2013) [47]              | +                    | +  | +  | +  | +  | +  |
|  | Gameel et al (2013) [48]                | +                    | +  | +  | +  | +  | +  |
|  | Eassa and El-Shazly (2013) [49]         | ?                    | +  | +  | +  | +  | -  |
|  | Akin et al (2013) [50]                  | +                    | +  | +  | -  | +  | -  |
|  | Simsek et al (2014) [51]                | ?                    | -  | -  | -  | +  | ×  |
|  | Shi et al (2014) [52]                   | ?                    | -  | +  | +  | +  | ×  |
|  | Rezakhaniha and Siroosbakht (2014) [53] | +                    | -  | +  | +  | +  | -  |
|  | Kirecci et al (2014) [54]               | ?                    | +  | +  | +  | -  | ×  |
|  | Otunctemur et al (2014) [55]            | ?                    | ?  | +  | ?  | +  | ×  |
|  | Kirecci et al (2014) [56]               | ?                    | +  | +  | +  | +  | -  |
|  | Saadat et al (2015) [57]                | +                    | +  | +  | +  | +  | +  |
|  | Polat et al (2015) [58]                 | -                    | -  | +  | -  | +  | ×  |
|  | Ozcan et al (2015) [59]                 | ?                    | +  | +  | +  | +  | -  |
|  | Kurkar et al (2015) [60]                | +                    | +  | +  | +  | +  | +  |
|  | Ketabchi (2015) [61]                    | +                    | +  | +  | -  | +  | -  |
|  | Sahin et al (2016) [62]                 | -                    | +  | +  | -  | +  | ×  |
|  | Pavone et al (2017) [63]                | +                    | ×  | +  | +  | +  | ×  |
|  | Dell'Atti et al (2017) [64]             | +                    | +  | +  | +  | +  | +  |
|  | Homayounfar et al (2018) [65]           | +                    | +  | +  | +  | +  | +  |
|  | Kilinc et al (2018) [66]                | +                    | +  | +  | -  | +  | -  |
|  | Hamidi-Madani et al (2018) [67]         | ?                    | +  | +  | +  | +  | -  |
|  | Abu El-Hamd and Abdelhamed (2018) [68]  | -                    | +  | +  | +  | +  | -  |
|  | Choi et al (2019) [69]                  | +                    | +  | +  | +  | +  | +  |
|  | Siroosbakht et al (2019) [70]           | +                    | +  | +  | +  | +  | +  |
|  | McMahon et al (2019) [71]               | ?                    | ×  | -  | -  | +  | ×  |
|  | Liu et al (2019) [72]                   | +                    | +  | +  | +  | +  | +  |
|  | Althof et al (2019) [73]                | +                    | +  | +  | +  | +  | +  |
|  | Alahwany et al (2019) [74]              | +                    | +  | +  | +  | +  | +  |
|  | Rehman et al (2020) [75]                | ?                    | ?  | +  | ?  | -  | ×  |
|  | Panda et al (2020) [76]                 | ?                    | +  | +  | +  | +  | -  |
|  | Sahan et al (2020) [77]                 | +                    | ?  | +  | +  | +  | -  |
|  | Alghobary et al (2020) [78]             | +                    | +  | +  | +  | +  | +  |
|  | El Najjar et al (2020) [79]             | +                    | +  | +  | +  | +  | +  |
|  | Siroosbakht et al (2021) [80]           | +                    | +  | +  | +  | +  | +  |
|  | Rodriguez et al (2021) [81]             | -                    | +  | +  | +  | +  | -  |

Study

Supplement Fig. 1. Continued 1.

Risk of bias domains

|                                  | D1 | D2 | D3 | D4 | D5 | D6 |
|----------------------------------|----|----|----|----|----|----|
| Mohseni Rad et al (2021) [82]    | +  | +  | +  | +  | +  | +  |
| Abu El-Hamd (2021) [83]          | +  | +  | +  | +  | +  | +  |
| Mohamed Gharib et al (2022) [84] | +  | +  | +  | +  | +  | +  |
| Haghighi et al (2022) [85]       | +  | +  | +  | +  | +  | +  |
| Abou Faddan et al (2022) [86]    | +  | +  | +  | +  | +  | +  |

Study

Domains:  
D1: bias arising from the randomization process  
D2: bias due to deviations from intended intervention  
D3: bias due to missing outcome data  
D4: bias in measurement of the outcome  
D5: bias in selection of the reported result

Judgement  
 High  
 Some concerns  
 Low  
 No information

Supplement Fig. 1. Continued 2.
