# Supplementary material for: Efficacy of Various Treatment in Premature Ejaculation: Systematic Review and Network Meta-Analysis
Source: PubMed Central journal article supplement — World J Mens Health. 2023 Aug 9;42(2):338–46. doi: 10.5534/wjmh.230030 (PMC10949017; doi:10.5534/wjmh.230030), 2023-08-09
Supplement: wjmh-42-338-s003.pdf [file wjmh-42-338-s003.pdf]

**Supplement Table 1.** Search queries

---

|                             |                                                                                                                                                                       |
|-----------------------------|-----------------------------------------------------------------------------------------------------------------------------------------------------------------------|
| PubMed and Cochrane Library | ("premature ejaculation"[MeSH Terms] OR "premature ejaculation"[tiab]) AND ("randomized controlled trial"[Publication Type] OR "comparative study"[Publication Type]) |
| Embase                      | 'premature ejaculation'/exp AND ('randomized controlled trial'/de OR 'comparative study'/de)                                                                          |

---
