# Supplementary material for: Efficacy of Various Treatment in Premature Ejaculation: Systematic Review and Network Meta-Analysis
Source: PubMed Central journal article supplement — World J Mens Health. 2023 Aug 9;42(2):338–46. doi: 10.5534/wjmh.230030 (PMC10949017; doi:10.5534/wjmh.230030), 2023-08-09
Supplement: wjmh-42-338-s004.pdf [file wjmh-42-338-s004.pdf]

Supplement Table 2. Characteristics of all studies included in meta-analysis

| Author (year)                | Journal                                     | Country     | No. of patients | Subject description                                       |                                                                                                                                                                                       | Experimental description                                                                                                                    | F/U duration |
|------------------------------|---------------------------------------------|-------------|-----------------|-----------------------------------------------------------|---------------------------------------------------------------------------------------------------------------------------------------------------------------------------------------|---------------------------------------------------------------------------------------------------------------------------------------------|--------------|
|                              |                                             |             |                 | Inclusion criteria                                        | Exclusion criteria                                                                                                                                                                    |                                                                                                                                             |              |
| Waldinger et al (1994) [1]   | American Journal of Psychiatry              | Netherlands | 17              | 18–75 years old                                           | ED, inhibited orgasm, alcohol and substance abuse, mental disorder, physical illness, use of medication including psychoactive medication                                             | Placebo<br>Paroxetine 20 mg daily                                                                                                           | 6 weeks      |
| Kara et al (1996) [2]        | Journal of Urology                          | Turkey      | 14              | 15–50 years, married patients with PE                     | ED, inhibited orgasm, alcohol or substance abuse, mental retardation                                                                                                                  | Placebo<br>Fluoxetine 20 mg/40 mg daily                                                                                                     | 4 weeks      |
| Waldinger et al (1997) [3]   | Journal of Urology                          | Netherlands | 34              | 18–60 years, history of primary PE                        | ED, alcohol or substance abuse, mental disorder, physical illness, psychoactive medication use, history of sexual abuse                                                               | Paroxetine 20 mg daily<br>Paroxetine 40 mg daily                                                                                            | 8 weeks      |
| Biri et al (1998) [4]        | International Urology and Nephrology        | Turkey      | 37              | IELT ≤1 min                                               | Neurological or psychiatric disorder, alcohol or drug abuse                                                                                                                           | Placebo<br>Sertraline 50 mg daily                                                                                                           | 4 weeks      |
| Kim and Seo (1998) [5]       | Journal of Urology                          | South Korea | 144             | IELT <2 min                                               | Major psychiatric disorder, ED, urethritis or chronic prostatitis, significant medical illness, history of alcoholism or substance abuse, use of any drug that affect sexual function | Placebo<br>Fluoxetine 40 mg daily<br>Sertraline 100 mg daily<br>Clomipramine 50 mg daily                                                    | 4 weeks      |
| Waldinger et al (1998) [6]   | Journal of Clinical Psychopharmacology      | Netherlands | 51              | 18–65 years with PE                                       | ED, alcohol or substance abuse/mental disorder/physical illnesses/concomitant medications/a history of sexual abuse of the patient or his partner                                     | Placebo<br>Fluvoxamine 100 mg daily<br>Fluoxetine 20 mg daily<br>Paroxetine 20 mg daily<br>Sertraline 50 mg daily                           | 6 weeks      |
| McMahon (1998) [7]           | Journal of Urology                          | Australia   | 37              | Ejaculation time <1 min                                   | ED, reduced sexual desire, inhibited male orgasm, chronic psychiatric or physical illness, alcohol or substance abuse, use of medication, including psychotropic medication           | Placebo<br>Sertraline 50 mg daily                                                                                                           | 12 weeks     |
| Choi et al (1999) [8]        | International Journal of Impotence Research | South Korea | 50              | Ejaculatory latency <3 min, sexual satisfaction rate <50% | Secondary PE, PE combined with ED or UTI, psychological problem, anti-depressant                                                                                                      | Placebo<br>Topical SS-cream 0.05 g<br>Topical SS-cream 0.10 g<br>Topical SS-cream 0.15 g<br>Topical SS-cream 0.20 g                         | 6 months     |
| Abdel-Hamid et al (2001) [9] | International Journal of Impotence Research | Egypt       | 51              | IELT <2 min                                               | History of psychiatric disorder, current physical illness, previous medical history to affect sexual function, substance abuse (alcohol or drug), secondary PE                        | Clomipramine 25 mg on demand<br>Sertraline 50 mg on demand<br>Paroxetine 20 mg on demand<br>Sildenafil 50 mg on demand<br>Squeeze technique | 4 weeks      |

Supplement Table 2. Continued 1

| Author (year)                   | Journal                                     | Country           | No. of patients | Subject description                |                                                                                                                                                                                                                                                  | Experimental description                                                               |              |
|---------------------------------|---------------------------------------------|-------------------|-----------------|------------------------------------|--------------------------------------------------------------------------------------------------------------------------------------------------------------------------------------------------------------------------------------------------|----------------------------------------------------------------------------------------|--------------|
|                                 |                                             |                   |                 | Inclusion criteria                 | Exclusion criteria                                                                                                                                                                                                                               | Treatment                                                                              | F/U duration |
| Waldinger et al (2001) [10]     | Journal of Clinical Psychopharmacology      | Netherlands       | 48              | 18–65 years with PE                | ED, alcohol or substance abuse, mental or physical illnesses, a history of sexual abuse, the partner's pregnancy or the wish for a child in the near future, the possibility of dangerous situations arising at work in the case of side effects | Placebo<br>Nefazodone 400 mg daily<br>Paroxetine 20 mg daily<br>Sertraline 50 mg daily | 6 weeks      |
| Salonia et al (2002) [11]       | Journal of Urology                          | Italy             | 80              | IELT ≤1 min                        | Organic cause of PE, ED, low libido, major depression, alcohol, drug or substance abuse, organic illness causing limitation of SSRI or sildenafil use                                                                                            | Paroxetine 20 mg on demand<br>Paroxetine 20 mg+Sildenafil 50 mg on demand              | 6 weeks      |
| Novaretti et al (2002) [12]     | Brazilian Journal of Urology                | Brazil            | 50              | PE complaint for at least 6 months | ED, use of antidepressant                                                                                                                                                                                                                        | Placebo<br>Fluoxetine 20 mg daily                                                      | 20 weeks     |
| Atmaca et al (2002) [13]        | International Journal of Impotence Research | Turkey            | 26              | PE                                 | ED, inhibited male orgasm, a severe physical illness, alcohol and any substance abuse or dependence, endocrinological state, psychotropic medication within last 2 weeks                                                                         | Placebo<br>Citalopram 20–60 mg daily                                                   | 8 weeks      |
| Manasia et al (2003) [14]       | Journal of Urology                          | Spain             | 80              | 19–53 years old                    | ED, alcohol or substance abuse, psychopathology or mental retardation                                                                                                                                                                            | Fluoxetine 90 mg weekly<br>Fluoxetine 20 mg daily                                      | 3 months     |
| Busato and Gallindo (2004) [15] | BJU International                           | Brazil            | 29              | 18–50 years with PE                | Organic cause of PE, ED, alcohol or substance abuse, diabetes, hypertension                                                                                                                                                                      | Placebo<br>Topical Lidocaine 25 mg + Prilocaine 25 mg cream                            | 8 weeks      |
| Kiliç et al (2005) [16]         | International Journal of Andrology          | Turkey            | 21              | IELT <2 min                        | Psychiatric or neurological disorder, history of sexual abuse, alcohol or substance abuse, drug affecting sexual function, pregnancy, ED, urethritis, chronic prostatitis, significant medical illness, thyroid dysfunction                      | Placebo<br>Venlafaxine XR 75 mg daily                                                  | 2 weeks      |
| McMahon et al (2005) [17]       | Journal of Sexual Medicine                  | Europe, Australia | 126             | 18–65 years, IIEF ≥22, IELT ≤2 min | Treating ED, history of vascular disease past 6 months, using nitrates or cytochrome P450 inhibitor                                                                                                                                              | Placebo<br>Sildenafil 5–100 mg on demand                                               | 8 weeks      |

Supplement Table 2. Continued 2

| Author (year)                         | Journal                                     | Country        | No. of patients | Subject description                   |                                                                                                                                                                                                                                                                                                                                                      | Experimental description                                                  |              |
|---------------------------------------|---------------------------------------------|----------------|-----------------|---------------------------------------|------------------------------------------------------------------------------------------------------------------------------------------------------------------------------------------------------------------------------------------------------------------------------------------------------------------------------------------------------|---------------------------------------------------------------------------|--------------|
|                                       |                                             |                |                 | Inclusion criteria                    | Exclusion criteria                                                                                                                                                                                                                                                                                                                                   | Treatment                                                                 | F/U duration |
| Safarinejad and Hosseini (2006) [18]  | International Journal of Impotence Research | Iran           | 51              | IELT <2 min                           | PE with ED, organic cause of PE including anatomical abnormalities, genital infection and neurological disorder, low libido, chronic depression, psychiatric or physical illness, alcohol, drug or substance abuse, organic illness causing limitation in SSRI use, use of psychotropic and antidepressant medication, serious relationship problems | Placebo<br>Citalopram 20 mg daily                                         | 12 weeks     |
| Safarinejad (2006) [19]               | Clinical Neuropharmacology                  | Iran           | 309             | IELT <2 min                           | PE with ED, organic cause of PE including anatomical abnormalities, genital infection and neurological disorder, low libido, chronic depression, psychiatric or physical illness, alcohol, drug or substance abuse, organic illness causing limitation in SSRI use, use of psychotropic and antidepressant medication, serious relationship problems | Placebo<br>Dapoxetine 60 mg daily<br>Paroxetine 20 mg daily               | 12 weeks     |
| Pryor et al (2006) [20]               | Lancet                                      | United States  | 2,614           | More than 18 years, IELT ≤2 min       | ED or other sexual dysfunction, use of SSRI or TCA, history of major psychiatric disorder, use of other therapy for PE                                                                                                                                                                                                                               | Placebo<br>Dapoxetine 30 mg on demand<br>Dapoxetine 50 mg on demand       | 12 weeks     |
| Arafa and Shamloul (2006) [21]        | International Journal of Impotence Research | Egypt          | 147             | IELT <2 min                           | ED, reduced sexual desire, inhibited male orgasm, chronic psychiatric or physical illness, alcohol or substance abuse, use of medication including psychotropic medication                                                                                                                                                                           | Sertraline 50 mg daily to<br>Placebo<br>Placebo to Sertraline 50 mg daily | 4 weeks      |
| Wang et al (2007) [22]                | International Journal of Urology            | China          | 180             | IELT <2 min                           | ED, low libido, major psychiatric or psychological illnesses including depression, alcohol, drugs or substances abuse, organic diseases causing limitation in using SSRI or sildenafil, use of other treatments for PE within the previous 3 months                                                                                                  | Sildenafil 50 mg on demand<br>Paroxetine 50 mg daily<br>Squeeze technique | 6 weeks      |
| Hosseini and Yarmohammadi (2007) [23] | Urologia Internationalis                    | Iran           | 91              | IELT <1 min                           | ED, alcohol and substance abuse, organic illness causing limitations in SSRI or sildenafil, low libido, major depression including other psychiatric or psychological illness, presence of psychopathology or mental retardation                                                                                                                     | Fluoxetine 20 mg on demand<br>Fluoxetine 20 mg+Sildenafil 50 mg on demand | 4 months     |
| Dinsmore et al (2007) [24]            | BJU International                           | United Kingdom | 54              | 18–75 years with PE at least 6 months | ED, reduced sexual desire, inhibited male orgasm, chronic psychiatric or physical illness, alcohol or substance abuse, use of medication including psychotropic medication                                                                                                                                                                           | Placebo<br>Lidocaine 22.5 mg+Prilocaine 7.5 mg spray                      | 4 weeks      |

Supplement Table 2. Continued 3

| Author (year)                  | Journal                                   | Country       | No. of patients | Subject description          |                                                                                                                                                                                                                                  | Experimental description                                                                                                                                         |              |
|--------------------------------|-------------------------------------------|---------------|-----------------|------------------------------|----------------------------------------------------------------------------------------------------------------------------------------------------------------------------------------------------------------------------------|------------------------------------------------------------------------------------------------------------------------------------------------------------------|--------------|
|                                |                                           |               |                 | Inclusion criteria           | Exclusion criteria                                                                                                                                                                                                               | Treatment                                                                                                                                                        | F/U duration |
| Athanasios et al (2007) [25]   | International Urology and Nephrology      | Greece        | 20              | PE                           | ED, severe physical illness, history of alcohol or any drug abuse                                                                                                                                                                | Placebo<br>Duloxetine 20 mg BID                                                                                                                                  | 12 weeks     |
| Arafa and Shamloul (2007) [26] | Therapeutics and Clinical Risk Management | Egypt         | 100             | IELT <2 min                  | ED, reduced sexual desire, inhibited male orgasm, chronic psychiatric or physical illness, alcohol or substance abuse, use of medication including psychotropic medication                                                       | Fluoxetine 20 mg daily<br>Escitalopram 10 mg daily<br>Paroxetine 20 mg daily                                                                                     | 4 weeks      |
| Salem et al (2008) [27]        | Journal of Sexual Medicine                | United States | 60              | IIEF $\geq 22$ , IELT <2 min | None                                                                                                                                                                                                                             | Placebo<br>Tramadol 25 mg on demand                                                                                                                              | 8 weeks      |
| Safarnejad (2008) [28]         | Journal of Clinical Psychopharmacology    | Iran          | 192             | PE                           | Patients with ED, reduced sexual desire, inhibited male orgasm, chronic psychiatric or physical illness, alcohol or substance abuse, use of medication including psychotropic medication                                         | Placebo daily<br>Venlafaxine 75 mg XR daily                                                                                                                      | 12 weeks     |
| Mattos et al (2008) [29]       | Urologia Internationalis                  | Brazil        | 60              | IELT <90 sec with IIEF >25   | Diabetics, contraindications to the use of any medication involved in the study, abuse of alcohol or use of illicit narcotics                                                                                                    | Placebo once a week<br>Fluoxetine 90 mg once a week<br>Placebo once a week +Tadalafil 20 mg on demand<br>Fluoxetine 90 mg once a week +Tadalafil 20 mg on demand | 12 weeks     |
| Mathers et al (2009) [30]      | Andrologia                                | Germany       | 72              | Primary PE more than 1 year  | Previous therapy of PE, who had known risk factors could possibly cause PE                                                                                                                                                       | Vardenafil 10 mg on demand<br>Sertraline 50 mg on demand                                                                                                         | 6 weeks      |
| Farnia et al (2009) [31]       | Acta Medica Iranica                       | Iran          | 80              | PE                           | ED, inhibited male orgasm, a severe physical or mental illness, the history of alcohol and any substance abuse or dependence, the presence of any endocrinological state, taking any psychotropic medication within last 2 weeks | Placebo on demand<br>Citalopram 20 mg on demand                                                                                                                  | 4 weeks      |

Supplement Table 2. Continued 4

| Author (year)                   | Journal                                     | Country                                                 | No. of patients | Subject description                                               |                                                                                                                                                                                                                                                                                                                                                                             | Experimental description                                                      |              |
|---------------------------------|---------------------------------------------|---------------------------------------------------------|-----------------|-------------------------------------------------------------------|-----------------------------------------------------------------------------------------------------------------------------------------------------------------------------------------------------------------------------------------------------------------------------------------------------------------------------------------------------------------------------|-------------------------------------------------------------------------------|--------------|
|                                 |                                             |                                                         |                 | Inclusion criteria                                                | Exclusion criteria                                                                                                                                                                                                                                                                                                                                                          | Treatment                                                                     | F/U duration |
| Dinsmore and Wyllie (2009) [32] | BJU International                           | Europe                                                  | 290             | PE patients ≥ 18 years                                            | ED with IIEF-5 ≤ 21, a severe physical or psychological condition, tricyclic antidepressants, MAO inhibitors or SSRI any treatment for PE within 4 weeks, alcohol or drug abuse, drug sensitivity to amide-type local anaesthetics, pregnancy, a history of glucose-6-phosphate dehydrogenase deficiency or use of medications, use of class I or III anti-arrhythmic drugs | Placebo on demand<br>7.5 mg Lidocaine + 2.5 mg Prilocaine spray on demand     | 3 months     |
| Buvat et al (2009) [33]         | European Urology                            | North, South America, Europe, Middle East, Asia-Pacific | 1,162           | Men ≥ 18 years with IELT < 2 min at least 6 months                | History of medical or psychiatric illness, uncontrolled hypertension or cardiac impairment, secondary PE, ED with IIEF < 21, partner sexual dysfunction, known hypersensitivity to SSRIs or serotonin norepinephrine reuptake inhibitors, concomitant use of SSRIs, tricyclic antidepressants, or other disallowed medications                                              | Placebo on demand<br>Dapoxetine 30 mg on demand<br>Dapoxetine 60 mg on demand | 24 weeks     |
| Aversa et al (2009) [34]        | International Journal of Impotence Research | Italy                                                   | 40              | Vardenafil naive with 18–35 years old, PEDT score ≥ 11, IIEF ≥ 22 | IELT ≥ 1 min, IIEF < 22, other ED, treatment with SSRI, other treatment for PE, history of vascular disease, using organic nitrate or cytochrome P450 inhibitor, hyperthyroidism, hypogonadism, prostatitis                                                                                                                                                                 | Placebo on demand<br>Vardenafil 10 mg on demand                               | 8 weeks      |
| McMahon et al (2010) [35]       | Journal of Sexual Medicine                  | Asia-Pacific regions                                    | 1067            | ≥ 18 years, IELT ≤ 2 min                                          | Medical or psychiatric illness, history of medical events that onset of PE, ED with IIEF < 21, use of SSRI or tricyclic antidepressant, known hypersensitivity to SSRI or serotonin norepinephrine reuptake inhibitor                                                                                                                                                       | Placebo on demand<br>Dapoxetine 30 mg on demand<br>Dapoxetine 60 mg on demand | 4 weeks      |
| Alghobary et al (2010) [36]     | Journal of Sexual Medicine                  | Egypt                                                   | 35              | PE at least 3 months with 20–50 years                             | Taking medications that may affect ejaculation at least 4 weeks. Major psychiatric illness                                                                                                                                                                                                                                                                                  | Tramadol 50 mg on demand<br>Paroxetine 20 mg on demand                        | 6 weeks      |
| Carson and Wyllie (2010) [37]   | Journal of Sexual Medicine                  | North America, Poland                                   | 249             | PE ≥ 18 years                                                     | IIEF ≤ 21, physical or psychological illness, use of antidepressant or MAO inhibitor or SSRI, use of any treatment for PE, alcohol or drug abuse, sensitivity to amide-type local anaesthetics, use of class I or III anti-arrhythmic drug                                                                                                                                  | Placebo on demand<br>7.5 mg Lidocaine + 2.5 mg Prilocaine spray on demand     | 3 months     |

Supplement Table 2. Continued 5

| Author (year)                          | Journal                                  | Country       | No. of patients | Subject description                                                                                                                      |                                                                                                                                                                                                                                                                                                                                                                                                                                                                                           | Experimental description                                                                       |              |
|----------------------------------------|------------------------------------------|---------------|-----------------|------------------------------------------------------------------------------------------------------------------------------------------|-------------------------------------------------------------------------------------------------------------------------------------------------------------------------------------------------------------------------------------------------------------------------------------------------------------------------------------------------------------------------------------------------------------------------------------------------------------------------------------------|------------------------------------------------------------------------------------------------|--------------|
|                                        |                                          |               |                 | Inclusion criteria                                                                                                                       | Exclusion criteria                                                                                                                                                                                                                                                                                                                                                                                                                                                                        | Treatment                                                                                      | F/U duration |
| Rezakhaniha and Sirosbakht (2010) [38] | Iranian Journal of Reproductive Medicine | Iran          | 77              | PE patients including who had anxiety disorder                                                                                           | Erection impotency, urogenital infection, systemic or neurological disorders, psychological problems, alcoholism, drug abuse                                                                                                                                                                                                                                                                                                                                                              | Fluoxetine 20 mg daily<br>Citalopram 40 mg daily                                               | 4 weeks      |
| Zhang et al (2012) [39]                | International Journal of Andrology       | China         | 78              | IELT <2 min, IIEF-5 >21, 18-35 years, previously treated with antidepressant drugs but not/ poorly responded or dislike oral medications | Balanitis, bleeding disorder, keloid formation, psychological medication                                                                                                                                                                                                                                                                                                                                                                                                                  | Circumcision<br>Selective resection of dorsal nerve                                            | 6 months     |
| Pastore et al (2012) [40]              | International Journal of Andrology       | Italy         | 34              | IELT <1 min                                                                                                                              | ED, phimosis, history of prostatitis, frenulum brevis                                                                                                                                                                                                                                                                                                                                                                                                                                     | Pelvic floor muscle rehabilitation<br>Dapoxetine 30 mg on demand<br>Dapoxetine 60 mg on demand | 12 weeks     |
| Kaynar et al (2012) [41]               | Urology                                  | Turkey        | 60              | IELT ≤1 min                                                                                                                              | ED (IIEF <23), anatomic or organic disorders of the urogenital system, urogenital infection, sex hormone disorders, medications that can affect ejaculation, a low libido, chronic depression, psychiatric or physical disorders, alcohol, drug, or substance abuse, use of psychotropic or antidepressant medication, take medication for PE, hypersensitive to tramadol                                                                                                                 | Placebo on demand<br>Tramadol 25 mg on demand                                                  | 8 weeks      |
| Bar-Or et al (2012) [42]               | European Urology                         | United States | 604             | IELT <1 min, 18-65 years                                                                                                                 | History of other psychiatric disorders requiring therapy, medication, suicide risk, physical illnesses, Other sexual dysfunction including ED as defined by the DSMIV-TR criteria, sexual intercourse usually less than once per week, partner sexual dysfunction, current use of dapoxetine or tramadol, sensitivity to phenylethone, history of abuse of prescription or illegal addictive drugs, use of medication within 30 d of screening with potential to cause sexual dysfunction | Placebo on demand<br>Tramadol 62 mg ODT on demand<br>Tramadol 89 mg ODT on demand              | 18 weeks     |
| Abdallah et al (2012) [43]             | Andrologia                               | Egypt         | 49              | IELT ≤2 min, circumcised                                                                                                                 | Sexual disorder, chronic psychiatric disease, hypertension, diabetes, alcohol or substance abuse, previous treatment of PE                                                                                                                                                                                                                                                                                                                                                                | Hyaluronic acid gel 2 mL injection                                                             | 3 months     |

Supplement Table 2. Continued 6

| Author (year)                   | Journal                                  | Country                                                 | No. of patients | Subject description                  |                                                                                                                                                                                              | Experimental description                                                                                                        |              |
|---------------------------------|------------------------------------------|---------------------------------------------------------|-----------------|--------------------------------------|----------------------------------------------------------------------------------------------------------------------------------------------------------------------------------------------|---------------------------------------------------------------------------------------------------------------------------------|--------------|
|                                 |                                          |                                                         |                 | Inclusion criteria                   | Exclusion criteria                                                                                                                                                                           | Treatment                                                                                                                       | F/U duration |
| Khan and Rasaily (2013) [44]    | Indian Journal of Psychological Medicine | India                                                   | 60              | 20-45 years                          | ED, chronic psychiatric or systemic disease, alcohol or substance abuse                                                                                                                      | Placebo daily<br>Placebo on demand<br>Tramadol 100 mg daily<br>Tramadol 100 mg on demand                                        | 8 weeks      |
| McMahon et al (2013) [45]       | Journal of Sexual Medicine               | North, South America, Europe, Middle East, Asia-Pacific | 222             | IELT ≤2 min, over 18 years, IIEF ≥21 | Serious physical or mental health, previous event or condition associated with PE, allergy to SSRI, drug abuse history, DSM-IV-TR psychiatric disorder                                       | Placebo on demand<br>Dapoxetine 30 mg on demand                                                                                 | 12 weeks     |
| Lee et al (2013) [46]           | Journal of Sexual Medicine               | South Korea                                             | 118             | PE with 30-70 years, PEDT score ≥11  | IIEF <22, self-reported sexual dysfunction, abuse of alcohol or substance, history of medical or psychiatric illness, use of SSRI, TCA, PDES inhibitor, contraindication of study medication | Dapoxetine 30 mg+Placebo on demand<br>Dapoxetine 30 mg +Mirode-nafil 50 mg on demand                                            | 12 weeks     |
| Shinghal et al (2013) [47]      | Journal of Sexual Medicine               | Netherlands, United States                              | 77              | 18-55 years, IELT <65 sec            | IIEF <22, medical or psychiatric illness, low libido, alcohol, drug or substance abuse, SSRI use, use of psychotropic and antidepressant medication                                          | Placebo on demand<br>Epelsiban 50 mg on demand<br>Epelsiban 100 mg on demand                                                    | 8 weeks      |
| Gameel et al (2013) [48]        | Arab Journal of Urology                  | Egypt                                                   | 144             | IELT <2 min                          | IIEF <22, drug abuse, Diabetes, urogenital disease, hepatic or renal impairment, psychiatric medication                                                                                      | Placebo on demand<br>Tramadol 50 mg on demand<br>Sildenafil 50 mg on demand<br>Paroxetine 20 mg on demand<br>Lidocaine 2.5% gel | 4 weeks      |
| Eassa and El-Shazly (2013) [49] | Asian Journal of Andrology               | Egypt                                                   | 300             | 25-50 years with PE                  | Secondary PE, sexual dysfunction, current physical illness, history of psychiatric or neurological disorder, substance abuse, taking drug known to affect sexual function                    | Tramadol 25 mg on demand<br>Tramadol 50 mg on demand<br>Tramadol 100 mg on demand                                               | 24 weeks     |
| Akin et al (2013) [50]          | Iranian Red Crescent Medical Journal     | Turkey                                                  | 108             | PE                                   | Drug abuse, sexual disorder, chronic prostatitis, using SSRI for PE                                                                                                                          | Sildenafil 4 mg daily<br>Tamsulosin 0.4 mg daily<br>Alfuzosin 10 mg daily<br>Terazosin 5 mg daily<br>Doksazosin 4 mg daily      | 2 weeks      |
| Simsek et al (2014) [51]        | Asian Journal of Andrology               | Turkey                                                  | 150             | PE with 30-36 years                  | ED, low libido, major psychiatric or psychological illness, alcohol, drugs or substances abuse, organic diseases causing limitation in using SSRIs                                           | Dapoxetine 30 mg on demand<br>Dapoxetine 60 mg on demand<br>Paroxetine 20 mg daily                                              | 4 weeks      |

Supplement Table 2. Continued 7

| Author (year)                            | Journal                                 | Country | No. of patients | Subject description                |                                                                                                                                                                                                            | Experimental description                                                                                  |              |
|------------------------------------------|-----------------------------------------|---------|-----------------|------------------------------------|------------------------------------------------------------------------------------------------------------------------------------------------------------------------------------------------------------|-----------------------------------------------------------------------------------------------------------|--------------|
|                                          |                                         |         |                 | Inclusion criteria                 | Exclusion criteria                                                                                                                                                                                         | Treatment                                                                                                 | F/U duration |
| Shi et al (2014) [52]                    | International Journal of Urology        | China   | 41              | >18 years, IELT <2 min, CIPE-5 <18 | Acquired PE, psychiatric history, previous surgery or medication that affects sexual function, ED, severe hypertension, diabetes, coronary disease, poor general health                                    | Soak in placebo<br>Soak in RTX solution                                                                   | 4 weeks      |
| Rezakhanlha and Siroosbakhsh (2014) [53] | Biosciences Biotechnology Research Asia | Iran    | 113             | >18 years                          | Hypersensitivity to experimental drug                                                                                                                                                                      | Citalopram 20 mg on demand<br>Citalopram 20 mg daily                                                      | 8 weeks      |
| Kirecci et al (2014) [54]                | Andrologia                              | Turkey  | 16              | IELT <1 min                        | ED, low libido, history of sexual abuse, chronic prostatitis, infravesical obstruction, organic, neurological, psychiatric disorder, psychoactive medication user, Diabetes, cancer                        | Paroxetine 20 mg daily<br>Sertraline 50 mg daily                                                          | 4 weeks      |
| Otunctemur et al (2014) [55]             | Andrologia                              | Turkey  | 60              | IELT <1 min                        | Diabetes, chronic disorder, ED, heavy smoker                                                                                                                                                               | Fluoxetine 20 mg daily<br>Paroxetine 20 mg daily<br>Sertraline 50 mg daily                                | 4 weeks      |
| Kirecci et al (2014) [56]                | Andrologia                              | Turkey  | 60              | PE                                 | Diabetes, hypertension, vascular disorder, renal failure, endocrine disorder, previous genitourinary surgery, psychiatric disorder, intermittent PE, heavy smoker                                          | Fluoxetine 20 mg daily<br>Paroxetine 20 mg daily<br>Sertraline 50 mg daily                                | 4 weeks      |
| Saadat et al (2015) [57]                 | Current Pharmaceutical Biotechnology    | Iran    | 40              | PE                                 | Hypersensitivity to caffeine, cardiac problems, liver, kidney, thyroid dysfunction, psychological problem, overweight, heavy smoker                                                                        | Placebo on demand<br>Caffeine 100 mg on demand                                                            | 3 weeks      |
| Polat et al (2015) [58]                  | Andrologia                              | Turkey  | 150             | Primary PE, 20-41 years            | ED, Diabetes, low libido, major psychiatric or psychological illness, alcohol, drugs or substance abuse, contraindication of SSRI or PDE-5 inhibitor                                                       | Paroxetine 20 mg daily<br>Tadalafil 20 mg on demand<br>Paroxetine 20 mg daily + Tadalafil 20 mg on demand | 4 weeks      |
| Ozcan et al (2015) [59]                  | International Urology and Nephrology    | Turkey  | 80              | PE                                 | Organic cause of PE, ED, low libido, psychiatric or psychological illness, alcohol, drugs or substance abuse, organic illness causing limitation in SSRI                                                   | Duloxetine 40 mg daily<br>Paroxetine 20 mg daily                                                          | 4 weeks      |
| Kurkar et al (2015) [60]                 | Urology Annals                          | Egypt   | 125             | PE with 20-55 years                | ED, Diabetes, hepatic or renal insufficiency, neurological or psychiatric disorder, drug abuse                                                                                                             | Placebo on demand<br>Tramadol 50 mg on demand<br>Tramadol 100 mg on demand                                | 2 months     |
| Ketabchi (2015) [61]                     | Nephro-Urology Monthly                  | Iran    | 126             | PE with 24-57 years                | History of psychiatric problem                                                                                                                                                                             | Placebo daily<br>Clomiphene 50 mg daily                                                                   | 12 weeks     |
| Sahin et al (2016) [62]                  | Urologia Internationalis                | Turkey  | 111             | IELT <1 min                        | Organic cause of PE, ED with IIEF <21, sexual dysfunction, low libido, prostatitis, psychiatric or psychological illness, alcohol, drug or substance abuse, organic disorder that contraindication of SSRI | Dapoxetine 30 mg on demand<br>Dapoxetine 60 mg on demand<br>Acupuncture<br>Sham acupuncture               | 4 weeks      |



Supplement Table 2. Continued 8

| Author (year)                           | Journal                                                  | Country     | No. of patients | Subject description                            |                                                                                                                                                                                                                                                                          | Experimental description                                                                                                                                    |              |
|-----------------------------------------|----------------------------------------------------------|-------------|-----------------|------------------------------------------------|--------------------------------------------------------------------------------------------------------------------------------------------------------------------------------------------------------------------------------------------------------------------------|-------------------------------------------------------------------------------------------------------------------------------------------------------------|--------------|
|                                         |                                                          |             |                 | Inclusion criteria                             | Exclusion criteria                                                                                                                                                                                                                                                       | Treatment                                                                                                                                                   | F/U duration |
| Pavone et al (2017) [63]                | Archivio Italiano di Urologia, Andrologia                | Italy       | 276             | IELT $\leq$ 2 min, PEDT >9                     | Psychiatric disorder, drug and alcohol abuse, severe chronic disease, neoplastic disease                                                                                                                                                                                 | Dapoxetine (30–60 mg) on demand<br>Group psychotherapy<br>Dapoxetine +group psychotherapy                                                                   | 4 months     |
| Dell'Atti et al (2017) [64]             | European Review for Medical and Pharmacological Sciences | Italy       | 78              | IIEF $\leq$ 21                                 | Use of TCA or SSRI, any treatment of PE, anti-arrhythmic drug, history of alcohol or drug abuse, pregnancy                                                                                                                                                               | Lidocaine spray on demand<br>Tadarafil 5 mg daily<br>Lidocaine spray on demand+<br>Tadarafil 5 mg daily                                                     | 3 months     |
| Homayuonfar et al (2018) [65]           | Advanced Biomedical Research                             | Iran        | 72              | IELT $\leq$ 2 min., 20–50 years, PEDT score >8 | History of psychiatric disorder, diabetes, renal insufficiency, liver disease, dyslipidemia, Hypertension, hypothyroidism or hyperthyroidism, cardiac arrhythmia, other sexual dysfunction, medication affecting ejaculatory function                                    | Placebo daily<br>Tamarind seed powder daily<br>Paroxetine 20 mg daily                                                                                       | 4 weeks      |
| Kilinc et al (2018) [66]                | Andrologia                                               | Turkey      | 105             | 18–45 years                                    | Use of medicine for endocrinological, metabolic, chronic systemic, psychiatric disease, use of alcohol or addictive substance, Peyronie's disease, chronic prostatitis, urethritis, active UTI, previous treatment of PE, absence of regular physical activity           | Dapoxetine 30 mg on demand<br>Moderate physical activity<br>minimal physical activity                                                                       | 30 days      |
| Hamidi-Madani et al (2018) [67]         | Journal of Reproduction and Infertility                  | Iran        | 133             | 18–55 years, IELT $\leq$ 1 min                 | Secondary PE, sexual dysfunction according to IIEF, history of major psychiatric disorder, endocrine disease, prostatitis, urogenital infection, drug or alcohol abuse, use or sensitivity of paroxetine or tramadol                                                     | Placebo on demand<br>Tramadol 50 mg on demand<br>Paroxetine 20 mg on demand                                                                                 | 12 weeks     |
| Abu El-Hamad and Abdelhamed (2018) [68] | Andrologia                                               | Egypt       | 250             | IELT $\leq$ 1 min, age $\geq$ 20               | Diabetes, renal or hepatic disease, chronic prostatitis, neurological disease, central nervous system medication                                                                                                                                                         | Placebo on demand<br>Paroxetine 30 mg on demand<br>Dapoxetine 30 mg on demand<br>Sildenafil 50 mg on demand<br>Dapoxetine 30 mg +Sildenafil 50 mg on demand | 6 weeks      |
| Choi et al (2019) [69]                  | Journal of Urology                                       | South Korea | 159             | 20–65 years, PEDT >9, IELT <2 min              | ED with IIEF $\leq$ 21, serious cardiovascular or cerebrovascular disease within 6 months, uncontrolled hypertension or Diabetes, major psychiatric or neurological disorder, TCA, MAO inhibitor or SSRI medication, hypersensitivity to TCA, history of organic illness | Placebo on demand<br>Clomipramine 1.5 mg on demand                                                                                                          | 12 weeks     |

Supplement Table 2. Continued 9

| Author (year)                | Journal                                     | Country                  | No. of patients | Subject description                                 |                                                                                                                                                                                                                                                                                                                       | Experimental description                                                                                          |              |
|------------------------------|---------------------------------------------|--------------------------|-----------------|-----------------------------------------------------|-----------------------------------------------------------------------------------------------------------------------------------------------------------------------------------------------------------------------------------------------------------------------------------------------------------------------|-------------------------------------------------------------------------------------------------------------------|--------------|
|                              |                                             |                          |                 | Inclusion criteria                                  | Exclusion criteria                                                                                                                                                                                                                                                                                                    | Treatment                                                                                                         | F/U duration |
| Siroobakht et al (2019) [70] | International Brazilian Journal of Urology  | Iran                     | 480             | 20–75 years                                         | Neurologic or psychological disorder, genital infection, history of pelvic surgery, Diabetes, alcohol or drug abuse, ED, use of PDE5 inhibitor                                                                                                                                                                        | Sertraline 50 mg BID<br>Fluoxetine 20 mg BID<br>Paroxetine 20 mg BID<br>Citalopram 20 mg BID                      | 8 weeks      |
| McMahon et al (2019) [71]    | Journal of Sexual Medicine                  | United States, Australia | 83              | 18–60 years, IELT ≤1 min                            | ED with IIEF <22, intracavernosal injection, penile implant, SSRI, TCA, MAO inhibitor, alpha blocker, 5α-reductase inhibitor, topical anesthetics, tramadol use                                                                                                                                                       | Placebo on demand<br>Cilostiban (400–800 mg) on demand                                                            | 4 weeks      |
| Liu et al (2019) [72]        | Journal of Sexual Medicine                  | China                    | 92              | 18–45 years, IIEF-5 >21, IELT <1 min No circumcised | Balanitis, bleeding disorder, keloid formation, psychiatric medication                                                                                                                                                                                                                                                | Selective dorsal neurectomy+circumcision<br>Circumcision                                                          | 6 months     |
| Althof et al (2019) [73]     | Journal of Sexual Medicine                  | United States            | 231             | 18–60 years, IELT ≤1 min                            | IELT >2 min, IIEF <22, PDE5 inhibitor, SSRI, MAO inhibitor, α-blocker, 5α-reductase inhibitor, tramadol use                                                                                                                                                                                                           | Placebo on demand<br>Cligosiban 400 mg on demand<br>Cligosiban 800 mg on demand<br>Cligosiban 1200 mg on demand   | 8 weeks      |
| Alahwany et al (2019) [74]   | International Journal of Impotence Research | Egypt                    | 30              | IELT ≥1 min                                         | ED, abnormal TSH, testosterone, prolactin level, prostatitis, history of drug abuse, psychiatric disorder, no circumcision                                                                                                                                                                                            | Saline 2 mL injection<br>Hyaluronic acid 2 mL injection                                                           | 1 month      |
| Rehman et al (2020) [75]     | Cureus                                      | Pakistan                 | 106             | 35–40 years, IELT ≤1 min                            | Low libido, ED, psychiatric or psychological disorder, organic illness which limit the use of SSRI, history of treatment of PE within 3 months                                                                                                                                                                        | Tramadol 50 mg on demand<br>Paroxetine 20 mg on demand                                                            | 8 weeks      |
| Panda et al (2020) [76]      | Journal of Medicinal Food                   | India                    | 116             | IELT ≤1 min, 18–50 years                            | ED or other sexual dysfunction, psychiatric or psychological illness, chronic mental disorder or medication that limit dosage of pregabalin, secondary PE                                                                                                                                                             | Placebo on demand<br>Pregabalin 75 mg on demand<br>Pregabalin 150 mg on demand                                    | 2 weeks      |
| Sahan et al (2020) [77]      | Andrologia                                  | Turkey                   | 114             | IELT ≤1 min, AIPE score <30                         | Lower urinary tract symptom or chronic pelvic pain which the reasons for secondary PE, ED, IIEF <21, low testosterone level, pregnancy, previous medication for PE, history of thyroid dysfunction, neurological disorder, psychiatric disorder, mental disorder, substance abuse, previous antidepressant medication | Sertraline 50 mg on demand<br>Sertraline 100 mg on demand<br>Dapoxetine 30 mg on demand<br>Sertraline 50 mg daily | 8 weeks      |
| Alghobary et al (2020) [78]  | Andrologia                                  | Egypt                    | 55              | SHIM score ≥22, IELT ≤1 min                         | ED, chronic medical or psychological disorder, drug intake that influence ejaculation, libido or erection past 8 weeks.                                                                                                                                                                                               | Dapoxetine 60 mg on demand<br>Lidocaine 10% spray                                                                 | 12 weeks     |

Supplement Table 2. Continued 9

| Author (year)                    | Journal                                     | Country | No. of patients | Subject description                         |                                                                                                                                                                                                                                                                                                                       | Experimental description                                                                                                                                          |              |
|----------------------------------|---------------------------------------------|---------|-----------------|---------------------------------------------|-----------------------------------------------------------------------------------------------------------------------------------------------------------------------------------------------------------------------------------------------------------------------------------------------------------------------|-------------------------------------------------------------------------------------------------------------------------------------------------------------------|--------------|
|                                  |                                             |         |                 | Inclusion criteria                          | Exclusion criteria                                                                                                                                                                                                                                                                                                    | Treatment                                                                                                                                                         | F/U duration |
| El Najjar et al (2020) [79]      | Journal of Sexual Medicine                  | Egypt   | 116             | IELT ≤1 min, 18–50 years                    | Lower urinary tract symptom or chronic pelvic pain which the reasons for secondary PE, ED, IIEF <21, low testosterone level, pregnancy, previous medication for PE, history of thyroid dysfunction, neurological disorder, psychiatric disorder, mental disorder, substance abuse, previous antidepressant medication | Placebo on demand<br>Pregabalin 75 mg on demand<br>Pregabalin 150 mg on demand                                                                                    | 2 weeks      |
| Siroosbakht et al (2021) [80]    | Asian Journal of Urology                    | Iran    | 240             | 20–65 years with PE                         | Neurologic disorder, psychological disorder, urinary or genital infection, history of pelvic surgery, Diabetes, alcohol and drug abuse                                                                                                                                                                                | Sertraline 50 mg BID<br>Sertraline 50 mg on demand                                                                                                                | 8 weeks      |
| Rodríguez et al (2021) [81]      | PLoS One                                    | Spain   | 40              | Over 18 years, PEDT score ≥ 11, IELT ≤2 min | History of alcohol abuse or dependence, psychological treatment before 6 months, Diabetes, habitual use of recreational drugs (except tobacco and caffeine)                                                                                                                                                           | Sphincter exercise<br>Sphincter exercise+masturbation device                                                                                                      | 8 weeks      |
| Mohseni Rad et al (2021) [82]    | Urology Journal                             | Iran    | 120             | 20–50 years, IELT ≤2 min                    | Diabetes, heart disease, high blood pressure, thyroid disease, sexually transmitted disease, psychiatric illness treated with psychiatric medication, ED                                                                                                                                                              | Dapoxetine 30 mg on demand<br>Paroxetine 20 mg daily<br>Paroxetine 20 mg daily+Tadalafil 50 mg on demand<br>Dapoxetine 30 mg on demand +Tadalafil 50 mg on demand | 4 weeks      |
| Abu El-Hamd (2021) [83]          | International Journal of Impotence Research | Egypt   | 150             | ≥20 years, circumcised                      | IIEF ≥22, chronic prostatitis, Diabetes, renal or liver disease, thyroid disease, neurological or psychiatric disease, allergic reaction to local anesthetics or alcohol, central nervous system medication or treatment for PE in previous 3 months                                                                  | Placebo<br>Lidocaine 5% spray                                                                                                                                     | 8 weeks      |
| Mohamed Gharib et al (2022) [84] | Arab Journal of Urology                     | Egypt   | 160             | 18–65 years with PE                         | Neurogenic disorder, parkinsonism, diabetes, active UTI, chronic prostatitis, chronic renal failure, Peyronie's disease, endocrine disorder, thyroid dysfunction, taking medication for PE, drug affecting erectile function                                                                                          | Placebo daily<br>Tadalafil 50 mg daily                                                                                                                            | 3 months     |
| Haghighi et al (2022) [85]       | Journal of Psychiatric Research             | Iran    | 46              | 18–65 years with PE                         | Treatment for PE previous, neurological disorder, psychiatric disorder, psychoactive drug                                                                                                                                                                                                                             | Placebo on demand<br>Modafinil 100 mg on demand                                                                                                                   | 4 weeks      |
| Abou Faddan et al (2022) [86]    | Arab Journal of Urology                     | Egypt   | 55              | IELT ≤1 min, 20–35 years                    | IIEF ≥22, Diabetes, hypertension, taking medication                                                                                                                                                                                                                                                                   | Placebo daily<br>Tadalafil 5 mg daily                                                                                                                             | 3 months     |

ED, Erectile dysfunction; PE, Premature ejaculation, IELT, Intra vaginal Ejaculation Latency Time, UTI, Urinary tract infection; XR, Extended-release; IIEF, International Index of Erectile function; SSRI, Selective serotonin reuptake inhibitor; BID: 2 in day, TCA, Tricyclic antidepressant; PEDT, Premature Ejaculation Diagnostic Tool; MAO, Monoamine oxidase inhibitor; ODT, Orally disintegrating tablet; DSM-IV-TR: diagnostic and statistical manual of mental disorders, fourth edition, text revision, PDE5 inhibitor, Phosphodiesterase 5 inhibitor; RTx: resinfertoxin, TSH: thyroid-stimulating hormone, CIPE-5, Chinese index of Premature ejaculation; AIPE, Arabic Index of Premature ejaculation; SHIM, Sexual Health Inventory for Men.

## REFERENCES

1. Waldinger MD, Hengeveld MW, Zwinderman AH. Paroxetine treatment of premature ejaculation: a double-blind, randomized, placebo-controlled study. *Am J Psychiatry* 1994;151:1377-9.
2. Kara H, Aydin S, Yücel M, Agargün MY, Odabaş O, Yilmaz Y. The efficacy of fluoxetine in the treatment of premature ejaculation: a double-blind placebo controlled study. *J Urol* 1996;156:1631-2.
3. Waldinger MD, Hengeveld MW, Zwinderman AH. Ejaculation-retarding properties of paroxetine in patients with primary premature ejaculation: a double-blind, randomized, dose-response study. *Br J Urol* 1997;79:592-5.
4. Biri H, Isen K, Sinik Z, Onaran M, Küpeli B, Bozkirli I. Sertraline in the treatment of premature ejaculation: a double-blind placebo controlled study. *Int Urol Nephrol* 1998;30:611-5.
5. Kim SC, Seo KK. Efficacy and safety of fluoxetine, sertraline and clomipramine in patients with premature ejaculation: a double-blind, placebo controlled study. *J Urol* 1998;159:425-7.
6. Waldinger MD, Hengeveld MW, Zwinderman AH, Olivier B. Effect of SSRI antidepressants on ejaculation: a double-blind, randomized, placebo-controlled study with fluoxetine, fluvoxamine, paroxetine, and sertraline. *J Clin Psychopharmacol* 1998;18:274-81.
7. McMahon CG. Treatment of premature ejaculation with sertraline hydrochloride: a single-blind placebo controlled crossover study. *J Urol* 1998;159:1935-8.
8. Choi HK, Xin ZC, Choi YD, Lee WH, Mah SY, Kim DK. Safety and efficacy study with various doses of SS-cream in patients with premature ejaculation in a double-blind, randomized, placebo controlled clinical study. *Int J Impot Res* 1999;11:261-4.
9. Abdel-Hamid IA, El Naggar EA, El Gilany AH. Assessment of as needed use of pharmacotherapy and the pause-squeeze technique in premature ejaculation. *Int J Impot Res* 2001;13:41-5.
10. Waldinger MD, Zwinderman AH, Olivier B. Antidepressants and ejaculation: a double-blind, randomized, placebo-controlled, fixed-dose study with paroxetine, sertraline, and nefazodone. *J Clin Psychopharmacol* 2001;21:293-7.
11. Salonia A, Maga T, Colombo R, Scattoni V, Briganti A, Cestari A, et al. A prospective study comparing paroxetine alone versus paroxetine plus sildenafil in patients with premature ejaculation. *J Urol* 2002;168:2486-9.
12. Novaretti JPT, Pompeo ACL, Arap S. Selective serotonin re-uptake inhibitor in the treatment of premature ejaculation. *Braz J Urol* 2002;28:116-22.
13. Atmaca M, Kuloglu M, Tezcan E, Semercioz A. The efficacy of citalopram in the treatment of premature ejaculation: a placebo-controlled study. *Int J Impot Res* 2002;14:502-5.
14. Manasia P, Pomerol J, Ribè N, Gutierrez del Pozo R, Alcover Garcia J. Comparison of the efficacy and safety of 90 mg versus 20 mg fluoxetine in the treatment of premature ejaculation. *J Urol* 2003;170:164-5.
15. Busato W, Galindo CC. Topical anaesthetic use for treating premature ejaculation: a double-blind, randomized, placebo-controlled study. *BJU Int* 2004;93:1018-21.
16. Kiliç S, Ergin H, Baydıncı YC. Venlafaxine extended release for the treatment of patients with premature ejaculation: a pilot, single-blind, placebo-controlled, fixed-dose crossover study on short-term administration of an antidepressant drug. *Int J Androl* 2005;28:47-52.
17. McMahon CG, Stuckey BG, Andersen M, Purvis K, Koppiker N, Haughie S, et al. Efficacy of sildenafil citrate (Viagra) in men with premature ejaculation. *J Sex Med* 2005;2:368-75.
18. Safarinejad MR, Hosseini SY. Safety and efficacy of citalopram in the treatment of premature ejaculation: a double-blind placebo-controlled, fixed dose, randomized study. *Int J Impot Res* 2006;18:164-9.
19. Safarinejad MR. Comparison of dapoxetine versus paroxetine in patients with premature ejaculation: a double-blind, placebo-controlled, fixed-dose, randomized study. *Clin Neuropharmacol* 2006;29:243-52.
20. Pryor JL, Althof SE, Steidle C, Rosen RC, Hellstrom WJ, Shabsigh R, et al. Efficacy and tolerability of dapoxetine in treatment of premature ejaculation: an integrated analysis of two double-blind, randomised controlled trials. *Lancet* 2006;368:929-37.
21. Arafa M, Shamloul R. Efficacy of sertraline hydrochloride in treatment of premature ejaculation: a placebo-controlled study using a validated questionnaire. *Int J Impot Res* 2006;18:534-8.
22. Wang WF, Wang Y, Minhas S, Ralph DJ. Can sildenafil treat primary premature ejaculation? A prospective clinical study. *Int J Urol* 2007;14:331-5.
23. Hosseini MM, Yarmohammadi H. Effect of fluoxetine alone and in combination with sildenafil in patients with premature ejaculation.

Urol Int 2007;79:28-32.

24. Dinsmore WW, Hackett G, Goldmeier D, Waldinger M, Dean J, Wright P, et al. Topical eutectic mixture for premature ejaculation (TEMPE): a novel aerosol-delivery form of lidocaine-prilocaine for treating premature ejaculation. *BJU Int* 2007;99:369-75.
25. Athanasios Z, Polyanthi P, George K. The efficacy of duloxetine in the treatment of premature ejaculation. *Int Urol Nephrol* 2007;39:115-8.
26. Arafa M, Shamloul R. A randomized study examining the effect of 3 SSRI on premature ejaculation using a validated questionnaire. *Ther Clin Risk Manag* 2007;3:527-31.
27. Salem EA, Wilson SK, Bissada NK, Delk JR, Hellstrom WJ, Cleves MA. Tramadol HCL has promise in on-demand use to treat premature ejaculation. *J Sex Med* 2008;5:188-93.
28. Safarinejad MR. Safety and efficacy of venlafaxine in the treatment of premature ejaculation: a double-blind, placebo-controlled, fixed-dose, randomised study. *Andrologia* 2008;40:49-55.
29. Mattos RM, Marmo Lucon A, Srougi M. Tadalafil and fluoxetine in premature ejaculation: prospective, randomized, double-blind, placebo-controlled study. *Urol Int* 2008;80:162-5.
30. Mathers MJ, Klotz T, Roth S, Lümmer G, Sommer F. Safety and efficacy of vardenafil versus sertraline in the treatment of premature ejaculation: a randomised, prospective and crossover study. *Andrologia* 2009;41:169-75.
31. Farnia V, Raisi F, Mohseni MG, Atharikia D, Ghafari Z. On-demand treatment of premature ejaculation with citalopram: a randomized double-blind study. *Acta Med Iran* 2009;47:353-7.
32. Dinsmore WW, Wyllie MG. PSD502 improves ejaculatory latency, control and sexual satisfaction when applied topically 5 min before intercourse in men with premature ejaculation: results of a phase III, multicentre, double-blind, placebo-controlled study. *BJU Int* 2009;103:940-9.
33. Buvat J, Tesfaye F, Rothman M, Rivas DA, Giuliano F. Dapoxetine for the treatment of premature ejaculation: results from a randomized, double-blind, placebo-controlled phase 3 trial in 22 countries. *Eur Urol* 2009;55:957-67.
34. Aversa A, Pili M, Francomano D, Bruzziches R, Spera E, La Pera G, et al. Effects of vardenafil administration on intravaginal ejaculatory latency time in men with lifelong premature ejaculation. *Int J Impot Res* 2009;21:221-7.
35. McMahon C, Kim SW, Park NC, Chang CP, Rivas D, Tesfaye F, et al. Treatment of premature ejaculation in the Asia-Pacific region: results from a phase III double-blind, parallel-group study of dapoxetine. *J Sex Med* 2010;7(1 Pt 1):256-68.
36. Alghobary M, El-Bayoumy Y, Mostafa Y, Mahmoud el-HM, Amr M. Evaluation of tramadol on demand vs. daily paroxetine as a long-term treatment of lifelong premature ejaculation. *J Sex Med* 2010;7:2860-7.
37. Carson C, Wyllie M. Improved ejaculatory latency, control and sexual satisfaction when PSD502 is applied topically in men with premature ejaculation: results of a phase III, double-blind, placebo-controlled study. *J Sex Med* 2010;7:3179-89.
38. Rezakhaniha B, Sirosbakht S. Efficacy of selective serotonin reuptake inhibitor (SSRI) in patient with premature ejaculation. *Iran J Reprod Med* 2010;8:55-9.
39. Zhang GX, Yu LP, Bai WJ, Wang XF. Selective resection of dorsal nerves of penis for premature ejaculation. *Int J Androl* 2012;35:873-9.
40. Pastore AL, Palleschi G, Leto A, Pacini L, Iori F, Leonardo C, et al. A prospective randomized study to compare pelvic floor rehabilitation and dapoxetine for treatment of lifelong premature ejaculation. *Int J Androl* 2012;35:528-33.
41. Kaynar M, Kilic O, Yurdakul T. On-demand tramadol hydrochloride use in premature ejaculation treatment. *Urology* 2012;79:145-9.
42. Bar-Or D, Salottolo KM, Orlando A, Winkler JV. A randomized double-blind, placebo-controlled multicenter study to evaluate the efficacy and safety of two doses of the tramadol orally disintegrating tablet for the treatment of premature ejaculation within less than 2 minutes. *Eur Urol* 2012;61:736-43.
43. Abdallah H, Abdelnasser T, Hosny H, Selim O, Al-Ahwany A, Shamloul R. Treatment of premature ejaculation by glans penis augmentation using hyaluronic acid gel: a pilot study. *Andrologia* 2012;44 Suppl 1:650-3.
44. Khan AH, Rasaily D. Tramadol use in premature ejaculation: daily versus sporadic treatment. *Indian J Psychol Med* 2013;35:256-9.
45. McMahon CG, Giuliano F, Dean J, Hellstrom WJ, Bull S, Tesfaye F, et al. Efficacy and safety of dapoxetine in men with premature ejaculation and concomitant erectile dysfunction treated with a phosphodiesterase type 5 inhibitor: randomized, placebo-controlled, phase III study. *J Sex Med* 2013;10:2312-25.
46. Lee WK, Lee SH, Cho ST, Lee YS, Oh CY, Yoo C, et al. Comparison between on-demand dosing of dapoxetine alone and dapoxetine plus mirodenafil in patients with lifelong premature ejaculation: prospective, randomized, double-blind, placebo-controlled, multicenter study. *J Sex Med* 2013;10:2832-41.

47. Shinghal R, Barnes A, Mahar KM, Stier B, Giancaterino L, Condrey LD, et al. Safety and efficacy of epelsiban in the treatment of men with premature ejaculation: a randomized, double-blind, placebo-controlled, fixed-dose study. *J Sex Med* 2013;10:2506-17.
48. Gameel TA, Tawfik AM, Abou-Farha MO, Bastawisy MG, El-Bendary MA, El-Gamasy Ael-N. On-demand use of tramadol, sildenafil, paroxetine and local anaesthetics for the management of premature ejaculation: a randomised placebo-controlled clinical trial. *Arab J Urol* 2013;11:392-7.
49. Eassa BI, El-Shazly MA. Safety and efficacy of tramadol hydrochloride on treatment of premature ejaculation. *Asian J Androl* 2013;15:138-42.
50. Akin Y, Gulmez H, Ates M, Bozkurt A, Nuhoglu B. Comparison of alpha blockers in treatment of premature ejaculation: a pilot clinical trial. *Iran Red Crescent Med J* 2013;15:e13805.
51. Simsek A, Kirecci SL, Kucuktopcu O, Ozgor F, Akbulut MF, Sarilar O, et al. Comparison of paroxetine and dapoxetine, a novel selective serotonin reuptake inhibitor in the treatment of premature ejaculation. *Asian J Androl* 2014;16:725-7.
52. Shi B, Li X, Chen J, Su B, Li X, Yang S, et al. Resiniferatoxin for treatment of lifelong premature ejaculation: a preliminary study. *Int J Urol* 2014;21:923-6.
53. Rezakhanlani B, Siroosbakhsh S. Comparative study of therapeutic effects of two medicinal procedures of citalopram in premature ejaculation. *Biosci Biotechnol Res Asia* 2014;11:953-8.
54. Kirecci SL, Simsek A, Yuksel A, Gurdal H, Gurbuz ZG, Usanmaz S. Relevance of seminal plasma nitric oxide levels and the efficacy of SSRI treatment on lifelong premature ejaculation. *Andrologia* 2014;46:1169-75.
55. Otuntemur A, Ozbek E, Kirecci SL, Ozcan L, Dursun M, Cekmen M, et al. Relevance of serum nitric oxide levels and the efficacy of selective serotonin reuptake inhibitors treatment on premature ejaculation: decreased nitric oxide is associated with premature ejaculation. *Andrologia* 2014;46:951-5.
56. Kirecci SL, Simsek A, Gurbuz ZG, Mimaroglu S, Yuksel A, Vural P, et al. Relationship between plasma melatonin levels and the efficacy of selective serotonin reuptake inhibitors treatment on premature ejaculation. *Int J Urol* 2014;21:917-20.
57. Saadat SH, Ahmadi K, Panahi Y. The effect of on-demand caffeine consumption on treating patients with premature ejaculation: a double-blind randomized clinical trial. *Curr Pharm Biotechnol* 2015;16:281-7.
58. Polat EC, Ozbek E, Otuntemur A, Ozcan L, Simsek A. Combination therapy with selective serotonin reuptake inhibitors and phosphodiesterase-5 inhibitors in the treatment of premature ejaculation. *Andrologia* 2015;47:487-92.
59. Ozcan L, Polat EC, Otuntemur A, Ozbek E. Duloxetine, dual serotonin and norepinephrine reuptake inhibitor, versus paroxetine, selective serotonin reuptake inhibitor, in the treatment for premature ejaculation. *Int Urol Nephrol* 2015;47:283-7.
60. Kurkar A, Elderwy AA, Abulsorour S, Awad SM, Safwat AS, Altaher A. A randomized, double-blind, placebo-controlled, crossover trial of "on-demand" tramadol for treatment of premature ejaculation. *Urol Ann* 2015;7:205-10.
61. Ketabchi AA. Clomiphene effects on idiopathic premature ejaculation. *Nephrourol Mon* 2015;7:e27281.
62. Sahin S, Bicer M, Yenice MG, Seker KG, Yavuzsan AH, Tugcu V. A prospective randomized controlled study to compare acupuncture and dapoxetine for the treatment of premature ejaculation. *Urol Int* 2016;97:104-11.
63. Pavone C, Abbadessa D, Gambino G, Scaduto G, Vella M. Premature ejaculation: pharmacotherapy vs group psychotherapy alone or in combination. *Arch Ital Urol Androl* 2017;89:114-9.
64. Dell'Atti L, Galosi AB, Ippolito C. A randomized single-center study to compare the efficacy and tolerability of tadalafil once daily plus lidocaine anesthetic spray on premature ejaculation. *Eur Rev Med Pharmacol Sci* 2017;21:1036-40.
65. Homayounfar A, Aminsharifi A, Salehi A, Sahraian A, Dehshari S, Bahrami M. A randomized double-blind placebo-controlled trial to assess the effect of tamarind seed in premature ejaculation. *Adv Biomed Res* 2018;7:59. Erratum in: *Adv Biomed Res* 2018;7:130.
66. Kilinc MF, Aydogmus Y, Yildiz Y, Doluoglu OG. Impact of physical activity on patient self-reported outcomes of lifelong premature ejaculation patients: results of a prospective, randomised, sham-controlled trial. *Andrologia* 2018;50:e12799.
67. Hamidi-Madani A, Motiee R, Mokhtari G, Nasseh H, Esmaeili S, Kazemnezhad E. The efficacy and safety of on-demand tramadol and paroxetine use in treatment of life long premature ejaculation: a randomized double-blind placebo-controlled clinical trial. *J Reprod Infertil* 2018;19:10-5.
68. Abu El-Hamd M, Abdelhamed A. Comparison of the clinical efficacy and safety of the on-demand use of paroxetine, dapoxetine, sildenafil and combined dapoxetine with sildenafil in treatment of patients with premature ejaculation: a randomised placebo-controlled clinical trial. *Andrologia* 2018;50:e12829.
69. Choi JB, Kang SH, Lee DH, Kim YS, Jeon JS, Choi WS, et al. Efficacy and safety of on demand clomipramine for the treatment of pre-

- mature ejaculation: a multicenter, randomized, double-blind, phase III clinical trial. *J Urol* 2019;201:147-52.
70. Siroosbakht S, Rezakhaniha S, Rezakhaniha B. Which of available selective serotonin reuptake inhibitors (SSRIs) is more effective in treatment of premature ejaculation? A randomized clinical trial. *Int Braz J Urol* 2019;45:1209-15.
  71. McMahon C, Althof S, Rosen R, Giuliano F, Miner M, Osterloh IH, et al. The oxytocin antagonist cligosiban prolongs intravaginal ejaculatory latency and improves patient-reported outcomes in men with lifelong premature ejaculation: results of a randomized, double-blind, placebo-controlled proof-of-concept trial (PEPIX). *J Sex Med* 2019;16:1178-87.
  72. Liu Q, Li S, Zhang Y, Cheng Y, Fan J, Jiang L, et al. Anatomic basis and clinical effect of selective dorsal neurectomy for patients with lifelong premature ejaculation: a randomized controlled trial. *J Sex Med* 2019;16:522-30.
  73. Althof S, Osterloh IH, Muirhead GJ, George K, Girard N. The oxytocin antagonist cligosiban fails to prolong intravaginal ejaculatory latency in men with lifelong premature ejaculation: results of a randomized, double-blind, placebo-controlled Phase IIb trial (PEDRIX). *J Sex Med* 2019;16:1188-98.
  74. Alahwany A, Ragab MW, Zaghoul A, Abdallah H, Mostafa T. Hyaluronic acid injection in glans penis for treatment of premature ejaculation: a randomized controlled cross-over study. *Int J Impot Res* 2019;31:348-55.
  75. Ur Rehman MF, Imran Zaidi A, Ul Haq T, Rafique S, Ali F. Comparison of the efficacy of tramadol and paroxetine in the management of premature ejaculation. *Cureus* 2020;12:e10725.
  76. Panda SK, Nirvanashetty S, Parachur VA, Mohanty N. A randomized double-blind placebo-control study to assess the efficacy and safety of OLNP-05 versus placebo for the treatment of subjects with premature ejaculation. *J Med Food* 2020;23:1006-13.
  77. Sahan A, Cubuk A, Ozkaptan O, Toprak T, Ozcan T, Ertas K, et al. Comparison of the safety and efficacy of the on-demand use of sertraline, dapoxetine, and daily use of sertraline in the treatment of patients with lifelong premature ejaculation: a prospective randomised study. *Andrologia* 2020;52:e13854.
  78. Alghobary M, Gaballah M, El-Kamel MF, State AF, Ismail SR, Selim MK, et al. Oral dapoxetine versus topical lidocaine as on-demand treatment for lifelong premature ejaculation: a randomised controlled trial. *Andrologia* 2020;52:e13558.
  79. El Najjar MR, El Hariri M, Ramadan A, Hefny Hashem AA. A double blind, placebo controlled, randomized trial to evaluate the efficacy and tolerability of on-demand oral pregablin (150 mg and 75 mg) in treatment of premature ejaculation. *J Sex Med* 2020;17:442-6.
  80. Siroosbakht S, Rezakhaniha S, Rezakhaniha B. Comparative study of on-demand and daily use of sertraline in treatment of premature ejaculation: a randomized clinical trial. *Asian J Urol* 2021;8:209-14.
  81. Rodríguez JE, Picazo JA, Marzo JC, Piqueras JA, Reina L, Hidalgo G, et al. Efficacy of Sphincter Control Training and medical device in the treatment of premature ejaculation: a multicenter randomized controlled clinical trial. *PLoS One* 2021;16:e0257284.
  82. Mohseni Rad H, Zahirian Moghadam T, Hosseinkhani A, Nima Soluki N, Amani F. Comparison of Dapoxetine/Tadalafil and Paroxetine/Tadalafil combination therapies for the treatment of the premature ejaculation: a randomized clinical trial. *Urol J* 2021;19:138-43.
  83. Abu El-Hamd M. Effectiveness and tolerability of lidocaine 5% spray in the treatment of lifelong premature ejaculation patients: a randomized single-blind placebo-controlled clinical trial. *Int J Impot Res* 2021;33:96-101. Erratum in: *Int J Impot Res* 2020;32:367.
  84. Mohamed Gharib T, Abdel-Al I, Elatreisy A, Kandeel W, El-Shaer W, Abdrabuh AM, et al. Short- and long-term follow-up results of daily 5-mg tadalafil as a treatment for erectile dysfunction and premature ejaculation. *Arab J Urol* 2022;20:49-53.
  85. Haghghi M, Jahangard L, Meybodi AM, Shayganfard M, Ahmadpanah M, Faryadres M, et al. Influence of modafinil on early ejaculation - results from a double-blind randomized clinical trial. *J Psychiatr Res* 2022;146:264-71.
  86. Abou Faddan AH, Gaber HD, Oamonov D. Effect of a tadalafil 5-mg single daily dose on lifelong premature ejaculation: a single-blinded placebo-controlled study. *Arab J Urol* 2022;20:100-4.
