# Supplementary figures and images for: Efficacy of Various Treatment in Premature Ejaculation: Systematic Review and Network Meta-Analysis
Source: PubMed Central journal article supplement — World J Mens Health. 2023 Aug 9;42(2):338–46. doi: 10.5534/wjmh.230030 (PMC10949017; doi:10.5534/wjmh.230030), 2023-08-09

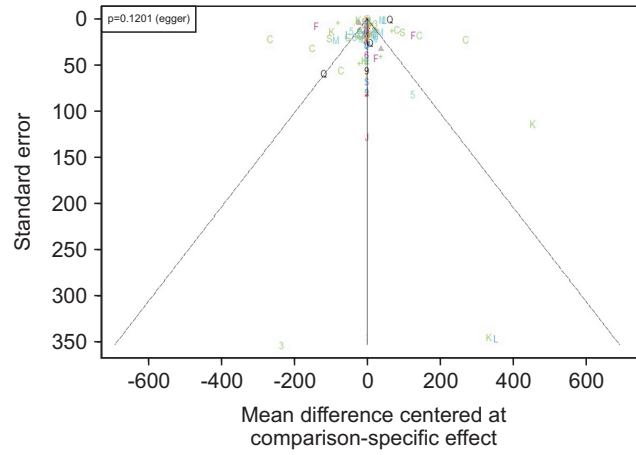

**Supplement Fig. 2.** Funnel plot for publication bias.

Supplement: wjmh-42-338-s002.pdf [file wjmh-42-338-s002.pdf]
